# Supplementary material for: Nuclear Factor I-C Regulates Stemness Genes and Proliferation of Stem Cells in Various Mineralized Tissue through Epithelial-Mesenchymal Interactions in Dental Epithelial Stem Cells
Source: Hindawi journal article supplement (doi:10.1155/2022/1092184), 2022-09-27

**WT**

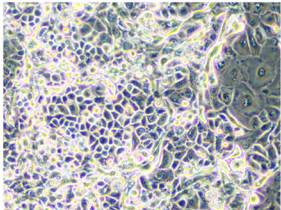

***Nfic*<sup>-/-</sup>**

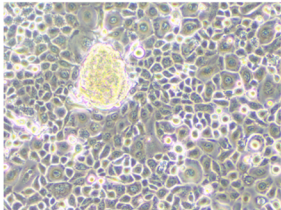

Supplement: f2 [file 1092184.f2.pdf]
